# Supplementary material
Source: PubMed Central journal article supplement (PMC3535016)
Supplement: NIHMS425727-supplement-Sup__Figure_2.pdf [file NIHMS425727-supplement-Sup__Figure_2.pdf]

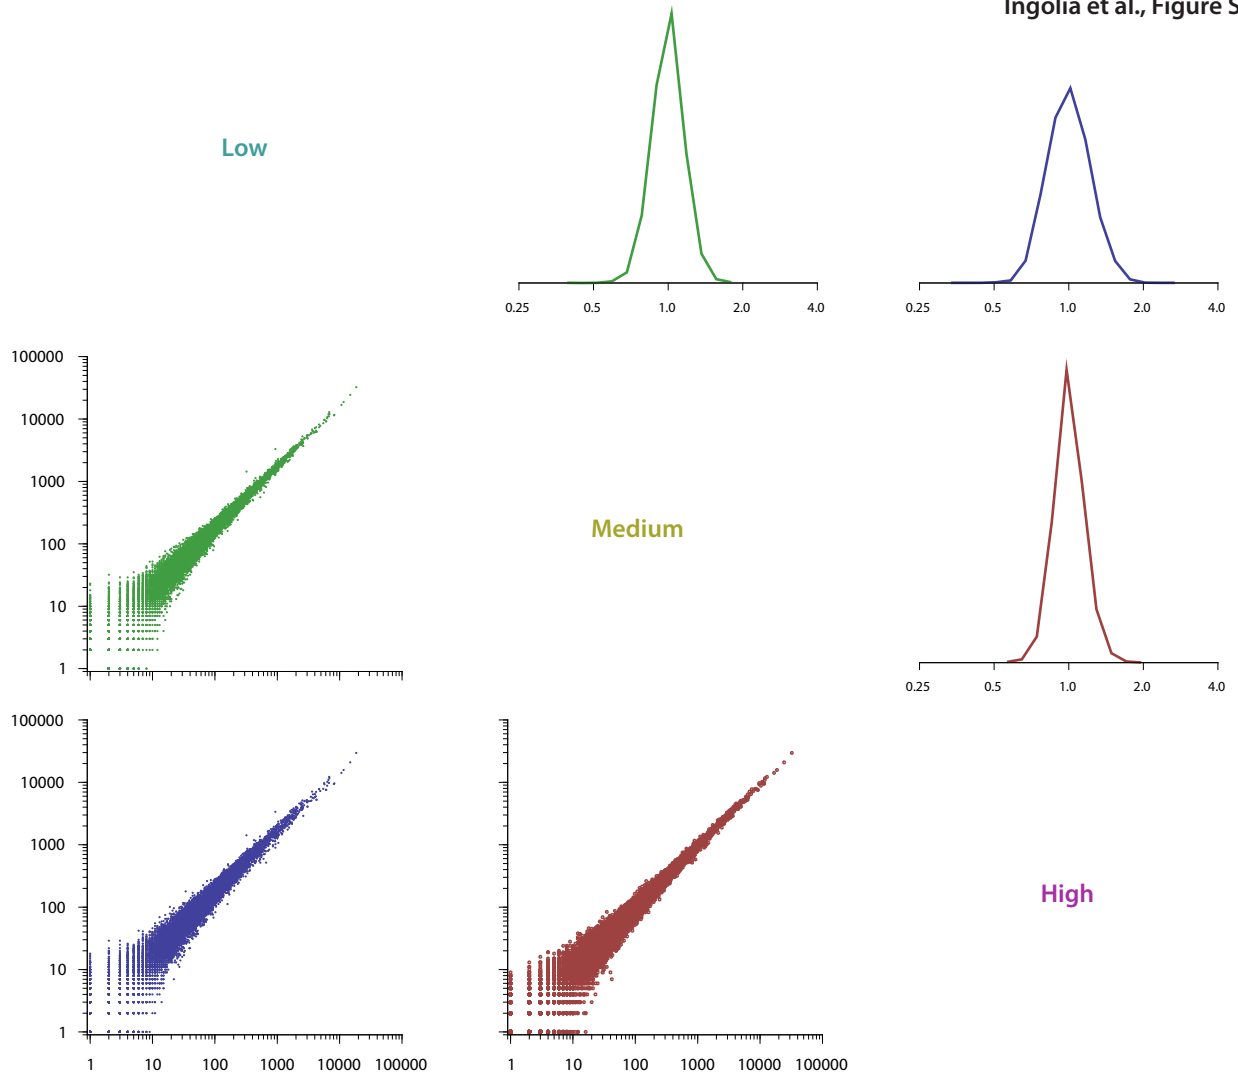

**Supplementary Figure 1.** Comparison of expression measurements in different buffer conditions. The lower left-hand triangle in the comparison matrix compares per-gene expression measurements under two different buffer conditions, as in Fig. 2b. The upper right-hand triangle shows the histogram of log<sub>2</sub> ratios in the comparison, as in Fig. 2b.
